# Supplementary material for: Effects of Triterpene Soyasapogenol B from Arachis hypogaea (Peanut) on Differentiation, Mineralization, Autophagy, and Necroptosis in Pre-Osteoblasts
Source: MDPI journal article supplement (doi:10.3390/ijms23158297), 2022-07-27
Supplement: s1 [file s1]

=====

|                                               |                                                                                                               |            |            |
|-----------------------------------------------|---------------------------------------------------------------------------------------------------------------|------------|------------|
| Acq. Operator                                 | : SYSTEM                                                                                                      | Seq. Line  | : 67       |
| Acq. Instrument                               | : 1260HPLC_ELSD2                                                                                              | Location   | : Vial 63  |
| Injection Date                                | : 2021-09-25 오전 4:16:16                                                                                       | Inj        | : 1        |
|                                               |                                                                                                               | Inj Volume | : 3.000 µl |
| Acq. Method                                   | : D:\BOMI\DATA\210923_`21PURITY\210923_`21PURITY(448-1009) 2021-09-23 18-07-54\PURITY_SOP.M                   |            |            |
| Last changed                                  | : 2021-09-24 오후 1:40:23 by SYSTEM                                                                             |            |            |
| Analysis Method                               | : D:\BOMI\DATA\210923_`21PURITY\210923_`21PURITY(448-1009) 2021-09-23 18-07-54\PURITY_SOP.M (Sequence Method) |            |            |
| Last changed                                  | : 2021-09-29 오후 2:12:18 by SYSTEM<br>(modified after loading)                                                 |            |            |
| Additional Info : Peak(s) manually integrated |                                                                                                               |            |            |

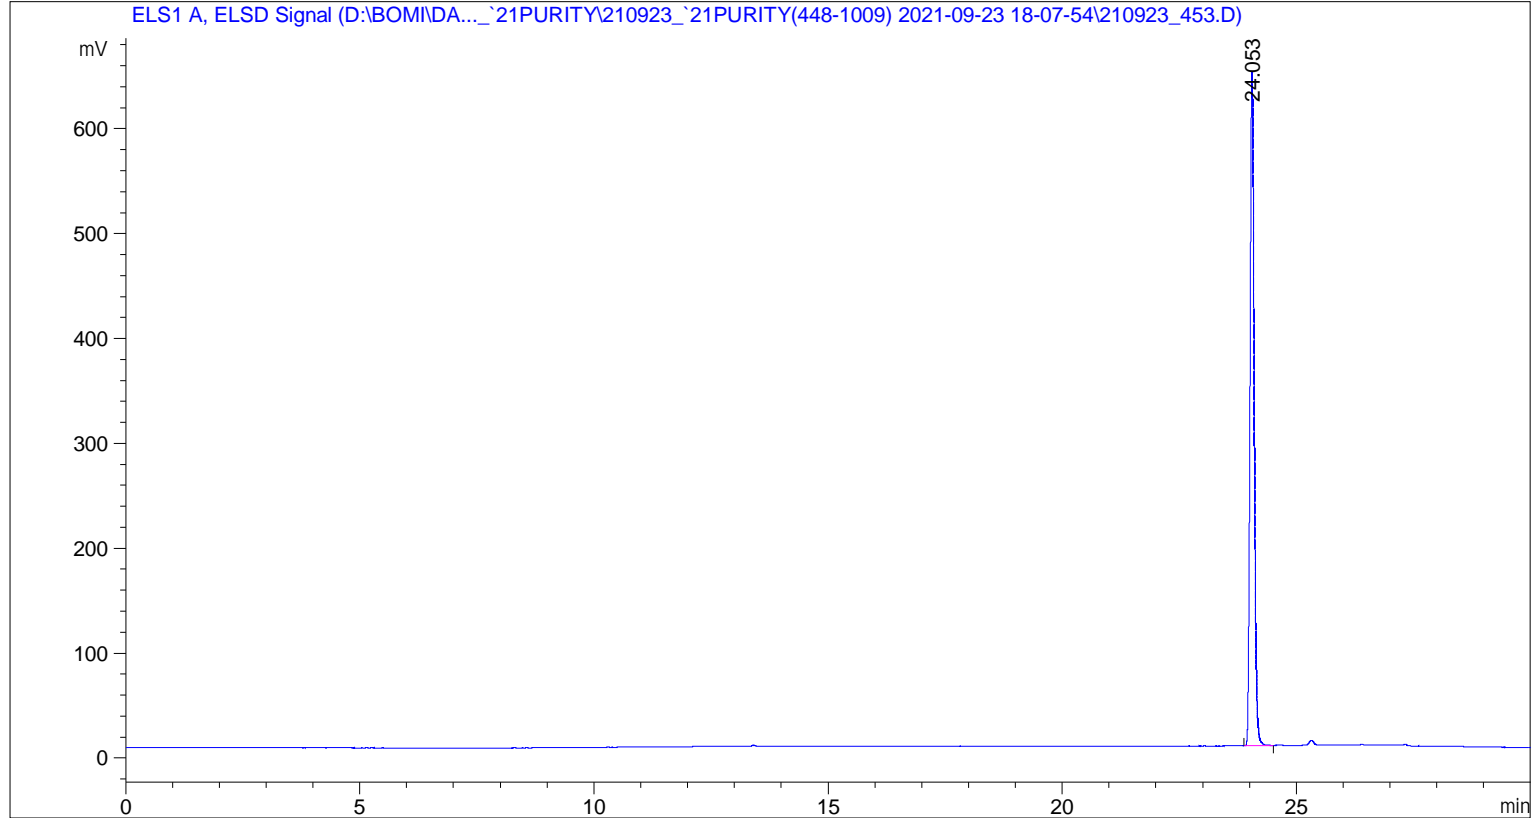

=====

Area Percent Report

=====

Sorted By : Signal  
Multiplier : 1.0000  
Dilution : 1.0000  
Use Multiplier & Dilution Factor with ISTDs

Signal 1: ELS1 A, ELSD Signal

| Peak # | RetTime [min] | Type | Width [min] | Area [mV*s] | Height [mV] | Area %   |
|--------|---------------|------|-------------|-------------|-------------|----------|
| 1      | 24.053        | BB   | 0.0958      | 3955.41187  | 642.78937   | 100.0000 |

Totals : 3955.41187 642.78937

=====  
\*\*\* End of Report \*\*\*
