# Supplementary figures and images for: Effects of Triterpene Soyasapogenol B from Arachis hypogaea (Peanut) on Differentiation, Mineralization, Autophagy, and Necroptosis in Pre-Osteoblasts
Source: MDPI journal article supplement (doi:10.3390/ijms23158297), 2022-07-27

□ \*DAD1, 23.895 (447 mAU, -) Ref=23.755 & 24.235

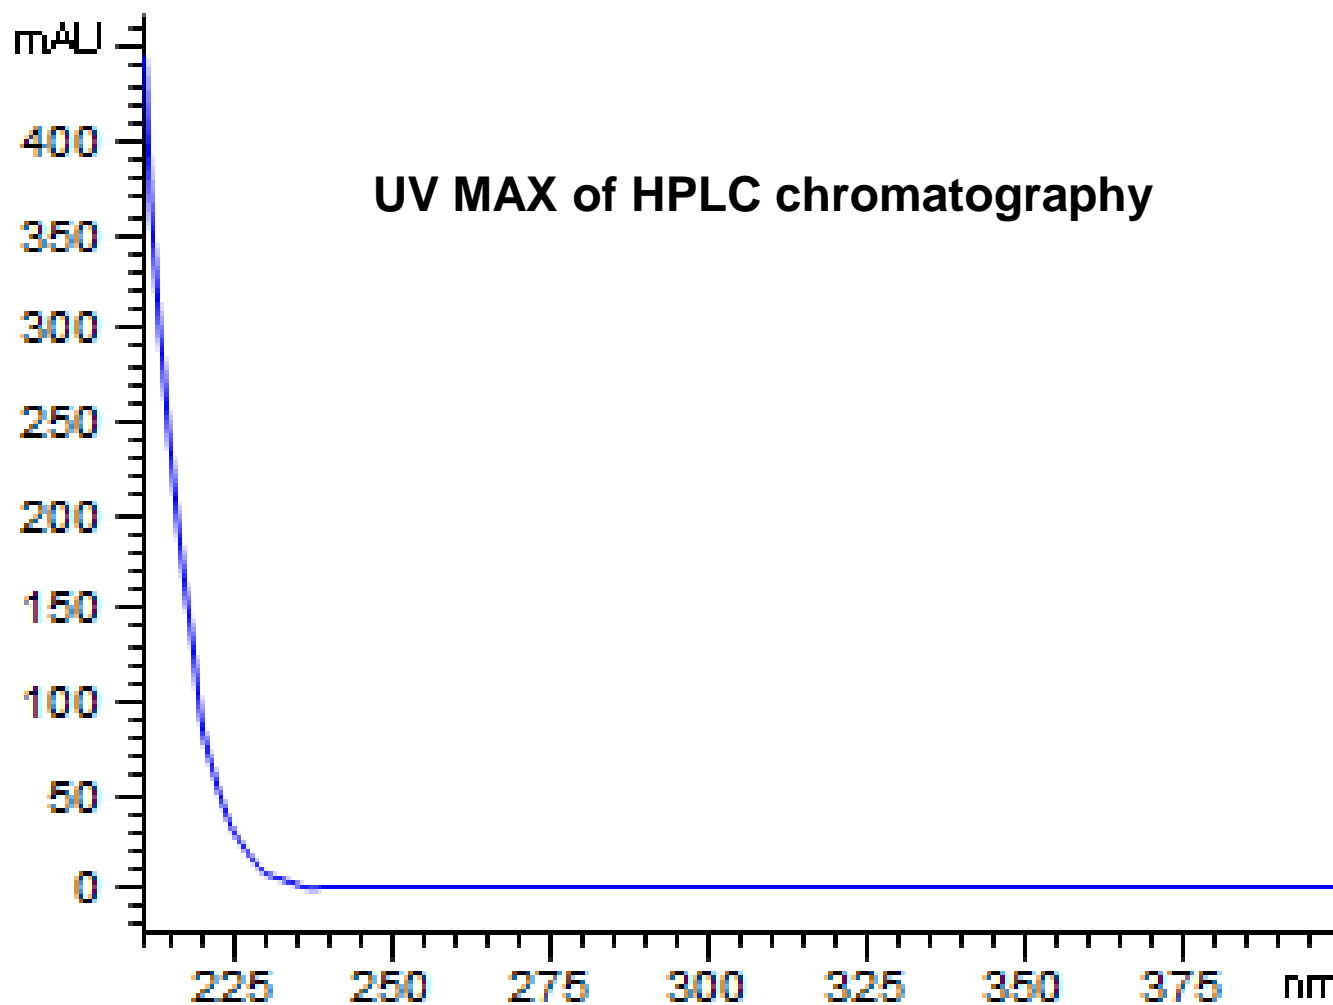

Supplement: s1 [file s1]
